# Supplementary material for: Cardiovascular Characteristics and Outcomes of Young Patients with COVID-19
Source: MDPI journal article supplement (doi:10.3390/jcdd8120165), 2021-11-26
Supplement: s1 [file s1]

## SUPPLEMENTAL MATERIAL

**Supplementary Table S1. Anticoagulation regimen during hospitalization according to the age.**

| Anticoagulation regimen | >45 y/o<br>(n = 2,385) | 18-45 y/o<br>(n = 300) |
|-------------------------|------------------------|------------------------|
| None                    | 274 (11.5)             | 63 (21.0)              |
| Prophylaxis dose        | 1362 (57.1)            | 183 (61.0)             |
| Intermediate dose       | 238 (10.0)             | 33 (11.0)              |
| Therapeutic dose        | 511 (21.4)             | 21 (7.0)               |

Data are presented as: absolute values (%).

The anticoagulation regimen was categorized into three groups: 1) prophylaxis dose (daily low molecular-weight heparin or twice daily subcutaneous unfractionated heparin); 2) intermediate dose (double the preventive dose); 3) therapeutic dose before hospitalization.

**Supplementary Table S2. Clinical, laboratory and radiologic findings on admission.**

| Variables                                             | Patients<br>>45 y/o<br>(n = 2,547) | Patients<br>18-45 y/o<br>(n = 321) | p value          | N value |
|-------------------------------------------------------|------------------------------------|------------------------------------|------------------|---------|
| <b>Clinical characteristics</b>                       |                                    |                                    |                  |         |
| Time from illness onset to hospitalization – days     | 6.7 ± 4.7                          | 7.2 ± 4.3                          | 0.065            | 2,772   |
| NYHA class III or IV – n (%)                          | 1,154 (52.1)                       | 124 (44.6)                         | 0.087            | 2,495   |
| Heart rate – bpm                                      | 86 ± 18                            | 93 ± 18                            | <b>&lt;0.001</b> | 2,621   |
| Systolic pressure – mmHg                              | 132 ± 22                           | 125 ± 18                           | <b>&lt;0.001</b> | 2,825   |
| Diastolic pressure – mmHg                             | 74 ± 14                            | 75 ± 13                            | 0.257            | 2,825   |
| Respiratory frequency – per min                       | 23 ± 6                             | 24 ± 7                             | 0.516            | 2,110   |
| Temperature – °C                                      | 37.5 ± 1.0                         | 37.6 ± 1.0                         | 0.072            | 2,825   |
| O <sub>2</sub> saturation – %                         | 94.6 ± 3.6                         | 95.9 ± 3.4                         | <b>&lt;0.001</b> | 2,849   |
| Glasgow score <15 – n (%)                             | 184 (7.3)                          | 9 (2.8)                            | <b>0.004</b>     | 2,834   |
| HF signs – n (%)                                      | 182 (7.3)                          | 7 (2.2)                            | <b>0.001</b>     | 2,819   |
| SIC score ≥4 – n (%)                                  | 1,016 (68.6)                       | 118 (62.1)                         | 0.083            | 1,670   |
| qSOFA ≥1 – n (%)                                      | 1,159 (62.0)                       | 138 (58.0)                         | 0.253            | 2,106   |
| <b>Laboratory data</b>                                |                                    |                                    |                  |         |
| PaO <sub>2</sub> – mmHg                               | 79.8 ± 26.7                        | 90.0 ± 43.4                        | <b>0.001</b>     | 2,016   |
| pH – IU                                               | 7.45 ± 0.06                        | 7.45 ± 0.05                        | 0.790            | 2,001   |
| PaO <sub>2</sub> /FiO <sub>2</sub> ratio <150 – n (%) | 169 (9.7)                          | 6 (2.9)                            | <b>0.002</b>     | 1,953   |
| Lactate – mmol/L                                      | 1.46 ± 1.01                        | 1.18 ± 0.57                        | <b>&lt;0.001</b> | 1,751   |
| Leukocytes – g/L                                      | 7.35 ± 5.29                        | 7.19 ± 3.66                        | 0.484            | 2,822   |
| Lymphocytes – g/L                                     | 1.28 ± 3.63                        | 1.52 ± 1.60                        | <b>0.044</b>     | 2,780   |
| Hemoglobin – g/dL                                     | 13.1 ± 2.0                         | 13.5 ± 1.9                         | <b>&lt;0.001</b> | 2,830   |
| C-Reactive Protein – mg/L                             | 92.8 ± 77.4                        | 70.7 ± 71.8                        | <b>&lt;0.001</b> | 2,754   |
| Platelet – g/L                                        | 219 ± 100                          | 231 ± 94                           | <b>0.032</b>     | 2,802   |
| Prothrombin rate – %                                  | 84 ± 18                            | 90 ± 12                            | <b>&lt;0.001</b> | 2,211   |
| aPTT ratio – IU                                       | 1.2 ± 0.3                          | 1.1 ± 0.1                          | <b>&lt;0.001</b> | 2,119   |
| Creatinine – μmol/L                                   | 100.0 ± 95.0                       | 81.7 ± 96.6                        | <b>0.002</b>     | 2,829   |
| Aspartate aminotransferase – UI/L                     | 55 ± 72                            | 46 ± 36                            | <b>0.001</b>     | 2,603   |
| Alanine aminotransferase – UI/L                       | 45 ± 60                            | 59 ± 150                           | 0.130            | 2,609   |
| Alkaline phosphatase – UI/L                           | 92 ± 125                           | 76 ± 50                            | <b>&lt;0.001</b> | 2,361   |
| Gamma-glutamyl-transferase – UI/L                     | 94 ± 136                           | 76 ± 86                            | <b>0.003</b>     | 2,296   |
| Albumin – g/L                                         | 31.4 ± 6.4                         | 35.5 ± 6.4                         | <b>&lt;0.001</b> | 1,641   |
| D-dimer – μg/L                                        | 1,707 ± 3801                       | 1,223 ± 2180                       | <b>0.026</b>     | 1,153   |
| Fibrinogen – g/L                                      | 6.1 ± 1.6                          | 5.4 ± 1.9                          | <b>&lt;0.001</b> | 1,376   |
| Elevated BNP or NT-pro-BNP* – n (%)                   | 921 (57.0)                         | 19 (11.9)                          | <b>&lt;0.001</b> | 1,774   |
| Troponin elevation† – no (%)                          | 542 (24.4)                         | 28 (15.1)                          | <b>&lt;0.001</b> | 1,759   |
| Positive SARS-CoV-2 RT-PCR – n (%)                    | 2,373 (93.0)                       | 293 (91.3)                         | 0.317            | 2,873   |
| <b>Abnormalities on chest CT</b>                      |                                    |                                    |                  |         |
| Severe parenchymal involvement (>50%) – n (%)         | 393 (19/7)                         | 36 (14.4)                          | 0.054            | 2,243   |

Otherwise specified, data are presented as mean ± SD. Percentages are based on patients for whom data were available.

\* BNP >50 pg/mL or NT-pro-BNP >300 pg/mL

† Troponin above each center threshold

*Abbreviations:* aPTT, activated partial thromboplastin time; BNP, brain natriuretic peptide; CT, computed tomography; FiO<sub>2</sub>, inspired oxygen fraction; HF, heart failure; NT-pro-BNP, N-terminal pro-brain natriuretic peptide; NYHA, New York Heart Association; PaO<sub>2</sub>, partial pressure of oxygen; qSOFA, quick sequential organ failure assessment score; RT-PCR, reverse-transcriptase polymerase chain reaction; SARS-CoV-2, severe acute respiratory syndrome coronavirus 2; SIC, sepsis-induced coagulopathy score; y/o, years old

**Supplementary Table S3. Electrocardiographic and echocardiographic findings of patients according to the presence or absence of myocarditis.**

| Variables                                   | All patients<br>(n = 2,868) | Myocarditis       |                 | p value      | N value |
|---------------------------------------------|-----------------------------|-------------------|-----------------|--------------|---------|
|                                             |                             | No<br>(n = 2,856) | Yes<br>(n = 22) |              |         |
| Age 18-45 y/o – n (%)                       | 321 (11.2)                  | 313 (11.0)        | 8 (36.4)        | <b>0.002</b> | 2,868   |
| <b>Electrocardiographic characteristics</b> |                             |                   |                 |              |         |
| Heart rate – bpm                            | 87 ± 18                     | 87 ± 18           | 91 ± 25         | 0.409        | 2,624   |
| Supraventricular arrhythmia – n (%)         | 260 (11.2)                  | 259 (11.3)        | 1 (5.0)         | 0.718        | 2,312   |
| Complete bundle branch block – n (%)        | 164 (7.7)                   | 162 (7.7)         | 2 (10.0)        | 0.573        | 2,121   |
| QT interval – msec                          | 435 ± 51                    | 435 ± 50          | 479 ± 77        | <b>0.030</b> | 1,162   |
| <b>Echocardiographic characteristics</b>    |                             |                   |                 |              |         |
| LVEF – n (%)                                |                             |                   |                 | <b>0.013</b> | 443     |
| 36-49%                                      | 50 (11.3)                   | 47 (11.0)         | 3 (20.0)        |              |         |
| ≤35%                                        | 53 (12.0)                   | 48 (11.2)         | 5 (33.3)        |              |         |
| LV dilatation – n (%)                       | 48 (11.6)                   | 43 (10.8)         | 5 (31.2)        | <b>0.028</b> | 413     |
| LV hypertrophy – n (%)                      | 100 (25.1)                  | 97 (25.4)         | 3 (18.8)        | 0.770        | 398     |
| RV dysfunction – n (%)                      | 65 (16.1)                   | 64 (16.4)         | 1 (7.7)         | 0.702        | 403     |
| Pericardial effusion – n (%)                | 47 (11.3)                   | 45 (11.1)         | 2 (15.4)        | 0.648        | 417     |

Otherwise specified, data are presented as mean ± SD.

*Abbreviations:* LVEF, left ventricle ejection fraction; LV, left ventricle; RV, right ventricle; y/o, years old

**Supplementary Table S4. Electrocardiographic and echocardiographic findings of patients according to the presence or absence of pericarditis.**

| Variables                                   | All patients<br>(n = 2,868) | Pericarditis      |                 | p value          | N value |
|---------------------------------------------|-----------------------------|-------------------|-----------------|------------------|---------|
|                                             |                             | No<br>(n = 2,859) | Yes<br>(n = 19) |                  |         |
| Age 18-45 y/o – n (%)                       | 321 (11.2)                  | 314 (11.0)        | 7 (36.8)        | <b>0.003</b>     | 2,868   |
| <b>Electrocardiographic characteristics</b> |                             |                   |                 |                  |         |
| Heart rate – bpm                            | 87 ± 18                     | 87 ± 18           | 83 ± 17         | 0.338            | 2,624   |
| Supraventricular arrhythmia – n (%)         | 260 (11.2)                  | 258 (11.2)        | 2 (11.8)        | 1.000            | 2,312   |
| Complete bundle branch block – n (%)        | 164 (7.7)                   | 164 (7.8)         | 0 (0.0)         | 0.210            | 2,121   |
| QT interval – msec                          | 435 ± 51                    | 436 ± 51          | 417 ± 46        | 0.268            | 1,162   |
| <b>Echocardiographic characteristics</b>    |                             |                   |                 |                  |         |
| LVEF – n (%)                                |                             |                   |                 |                  |         |
| 36-49%                                      | 50 (11.3)                   | 49 (11.4)         | 1 (8.3)         | 0.332            | 443     |
| <35%                                        | 53 (12.0)                   | 50 (11.6)         | 3 (25.0)        |                  |         |
| LV dilatation* – n (%)                      | 48 (11.6)                   | 46 (11.4)         | 2 (18.2)        | 0.460            | 413     |
| LV hypertrophy <sup>†</sup> – n (%)         | 100 (25.1)                  | 99 (25.4)         | 1 (11.1)        | 0.460            | 398     |
| RV dysfunction <sup>‡</sup> – n (%)         | 65 (16.1)                   | 64 (16.3)         | 1 (10.0)        | 1.000            | 403     |
| Pericardial effusion – n (%)                | 47 (11.3)                   | 38 (9.4)          | 9 (81.8)        | <b>&lt;0.001</b> | 417     |

Otherwise specified, data are presented as mean ± SD.

\* LV dilatation was defined according to echocardiographic criteria: diastolic LV internal dimension assessed in M-mode tracing or 2D-guided linear measurements in parasternal long-axis view >58 mm in male or >52 mm in female, or a LV end-diastolic volume assessed via biplane disk summation method in apical four- and two-chamber views >150 mL or 74 mL/m<sup>2</sup> in male, or >106 mL or 61 mL/m<sup>2</sup> in female

<sup>†</sup> LV hypertrophy was defined as a LV mass index >115 g/m<sup>2</sup> in male or >95 g/m<sup>2</sup> in female measured in echocardiography

<sup>‡</sup> RV dysfunction was defined by echocardiography as a TAPSE <17 mm and/or a pulsed Doppler S wave <9.5 cm/sec or a fractional area change <35%

*Abbreviations:* LVEF, left ventricle ejection fraction; LV, left ventricle; RV, right ventricle; y/o, years old

**Supplementary Table S5. Rates of cardiovascular complications stratified by the presence or absence of primary outcome during hospitalization in young patients.**

| <b>Outcomes</b>          | <b>All patients 18-45 y/o (n = 321)</b> | <b>Patients 18-45 y/o without primary outcome (n = 267)</b> | <b>Patients 18-45 y/o with primary outcome (n = 54)</b> |
|--------------------------|-----------------------------------------|-------------------------------------------------------------|---------------------------------------------------------|
| Acute coronary syndrome  | 1 (0.3)                                 | 0 (0.0)                                                     | 1 (1.9)                                                 |
| Ischemic stroke          | 1 (0.3)                                 | 0 (0.0)                                                     | 1 (1.9)                                                 |
| Acute pulmonary embolism | 16 (5.0)                                | 11 (4.1)                                                    | 5 (9.3)                                                 |
| Acute heart failure      | 3 (0.93)                                | 0 (0.0)                                                     | 3 (5.6)                                                 |
| Acute myocarditis        | 8 (2.5)                                 | 6 (2.2)                                                     | 2 (3.7)                                                 |
| Acute pericarditis       | 7 (2.2)                                 | 5 (1.9)                                                     | 2 (3.7)                                                 |

Data are presented as n (%).

*Abbreviations:* y/o, years old

**Supplementary Table S6. Outcomes of young patients according to sex.**

| Outcomes                                     | Patients 18-45 y/o<br>(n = 321) |                  | p value      |
|----------------------------------------------|---------------------------------|------------------|--------------|
|                                              | Women<br>(n = 147)              | Men<br>(n = 174) |              |
| Transfer to ICU or in-hospital death – n (%) | 18 (12.2)                       | 36 (20.7)        | 0 .062       |
| In-hospital death – n (%)                    | 1 (0.7)                         | 2 (1.2)          | 1.000        |
| Transfer to ICU – n (%)                      | 18 (12.2)                       | 35 (20.1)        | 0.082        |
| Length of stay – days                        | 5.8 ± 4.8                       | 7.0 ± 4.7        | <b>0.033</b> |
| Cardiovascular complications – n (%)         |                                 |                  |              |
| Acute coronary syndrome                      | 0 (0.0)                         | 1 (0.3)          | 1.00         |
| Ischemic stroke                              | 1 (0.7)                         | 0 (0.0)          | 0.458        |
| Acute pulmonary embolism                     | 2 (1.4)                         | 14 (8.1)         | <b>0.013</b> |
| Acute heart failure                          | 1 (0.7)                         | 2 (1.2)          | 1.000        |
| Acute pericarditis                           | 3 (2.0)                         | 4 (2.3)          | 1.000        |
| Acute myocarditis                            | 3 (2.0)                         | 5 (2.9)          | 0.731        |

Otherwise specified, data are presented as mean ± standard deviation. Percentages are based on the total number in each column.

*Abbreviations:* ICU, intensive care unit; y/o, years old

**Supplementary Table S7. Sensitivity analysis of the study population divided by groups of ten years.**

| Variables                                    | Patients<br>18-31 y/o<br>(n = 83) | Patients<br>31-41 y/o<br>(n = 161) | Patients<br>41-50 y/o<br>(n = 268) | Patients<br>>50 y/o<br>(n = 2356) | p value          | N value |
|----------------------------------------------|-----------------------------------|------------------------------------|------------------------------------|-----------------------------------|------------------|---------|
| <b>Demographic characteristics</b>           |                                   |                                    |                                    |                                   |                  |         |
| Age – y/o                                    | 26.4 ± 3.5                        | 36.4 ± 2.9                         | 46.7 ± 2.8                         | 72.4 ± 12.3                       | <b>&lt;0.001</b> | 2,868   |
| Male – n (%)                                 | 41 (49.4)                         | 87 (54.0)                          | 169 (63.1)                         | 1365 (57.9)                       | 0.095            | 2,868   |
| BMI – kg/m <sup>2</sup>                      | 27.9 ± 6.9                        | 29.2 ± 6.8                         | 29.2 ± 6.4                         | 27.6 ± 5.9                        | <b>&lt;0.001</b> | 2,489   |
| <b>Cardiovascular risk factors</b>           |                                   |                                    |                                    |                                   |                  |         |
| Smoking – n (%)                              | 12 (14.5)                         | 14 (8.8)                           | 26 (10.0)                          | 324 (13.8)                        | 0.091            | 2,805   |
| Hypertension – n (%)                         | 1 (1.2)                           | 18 (11.4)                          | 58 (21.8)                          | 1374 (58.3)                       | <b>&lt;0.001</b> | 2,854   |
| Diabetes – n (%)                             | 2 (2.4)                           | 12 (7.5)                           | 27 (10.1)                          | 635 (27.0)                        | <b>&lt;0.001</b> | 2,855   |
| Dyslipidemia – n (%)                         | 2 (2.4)                           | 8 (5.0)                            | 27 (10.2)                          | 759 (32.4)                        | <b>&lt;0.001</b> | 2,854   |
| Familial premature CVD – n (%)               | 0 (0.0)                           | 0 (0.0)                            | 3 (1.2)                            | 41 (1.9)                          | 0.236            | 2,710   |
| <b>Medical history</b>                       |                                   |                                    |                                    |                                   |                  |         |
| COPD – n (%)                                 | 0 (0.0)                           | 0 (0.0)                            | 5 (1.9)                            | 157 (6.7)                         | <b>&lt;0.001</b> | 2,868   |
| CKD* – n (%)                                 | 0 (0.01)                          | 8 (5/0)                            | 11 (4.1)                           | 282 (16.5)                        | <b>&lt;0.001</b> | 2,831   |
| Stroke – n (%)                               | 1 (1.2)                           | 2 (1.3)                            | 2 (0.8)                            | 246 (10.6)                        | <b>&lt;0.001</b> | 2,832   |
| PAD – n (%)                                  | 0 (0.0)                           | 3 (1.9)                            | 1 (0.4)                            | 141 (6.1)                         | <b>&lt;0.001</b> | 2,833   |
| Atrial fibrillation – n (%)                  | 2 (2.4)                           | 2 (1.3)                            | 3 (1.1)                            | 405 (17.4)                        | <b>&lt;0.001</b> | 2,847   |
| Heart failure – n (%)                        | 3 (3.7)                           | 6 (3.8)                            | 6 (2.3)                            | 311 (13.4)                        | <b>&lt;0.001</b> | 2,823   |
| CAD – n (%)                                  | 0 (0.0)                           | 0 (0.0)                            | 6 (2.2)                            | 354 (15.0)                        | <b>&lt;0.001</b> | 2,868   |
| Malignancy – n (%)                           | 3 (3.6)                           | 7 (4.4)                            | 14 (4.8)                           | 391 (16.6)                        | <b>&lt;0.001</b> | 2,868   |
| VTE disease – n (%)                          | 2 (2.4)                           | 3 (1.9)                            | 9 (3.4)                            | 198 (8.4)                         | <b>&lt;0.001</b> | 2,868   |
| <b>Treatment before hospitalization</b>      |                                   |                                    |                                    |                                   |                  |         |
| Anticoagulation – n (%)                      | 3 (3.6)                           | 4 (2.5)                            | 5 (1.9)                            | 405 (17.2)                        | <b>&lt;0.001</b> | 2,868   |
| Beta-blockers – n (%)                        | 1 (1.2)                           | 7 (4.4)                            | 25 (9.3)                           | 697 (29.6)                        | <b>&lt;0.001</b> | 2,868   |
| ACEi – n (%)                                 | 1 (1.2)                           | 5 (3.1)                            | 18 (6.7)                           | 482 (20.4)                        | <b>&lt;0.001</b> | 2,868   |
| ARB – n (%)                                  | 1 (1.2)                           | 5 (3.1)                            | 19 (7.1)                           | 443 (18.8)                        | <b>&lt;0.001</b> | 2,868   |
| Diuretics – n (%)                            | 1 (1.2)                           | 4 (2.5)                            | 14 (5.2)                           | 541 (23.0)                        | <b>&lt;0.001</b> | 2,868   |
| Statins – n (%)                              | 1 (1.2)                           | 4 (2.5)                            | 21 (7.8)                           | 626 (26.6)                        | <b>&lt;0.001</b> | 2,868   |
| <b>Outcomes</b>                              |                                   |                                    |                                    |                                   |                  |         |
| Transfer to ICU or in-hospital death – n (%) | 8 (9.6)                           | 33 (20.5)                          | 60 (22.4)                          | 736 (31.2)                        | <b>&lt;0.001</b> | 2,868   |
| In-hospital death – n (%)                    | 0 (0.0)                           | 1 (0.6)                            | 7 (2.6)                            | 353 (15.0)                        | <b>&lt;0.001</b> | 2,868   |
| Transfer to ICU – n (%)                      | 8 (9.6)                           | 33 (20.5)                          | 57 (21.3)                          | 453 (19.2)                        | 0.122            | 2,868   |
| Length of stay – days                        | 5.6 ± 4.3                         | 6.9 ± 5.1                          | 7.6 ± 5.2                          | 9.3 ± 5.9                         | <b>&lt;0.001</b> | 2,868   |
| Cardiovascular complications – n (%)         | 0 (0.0)                           | 0 (0.0)                            | 1 (0.4)                            | 35 (1.5)                          | 0.234            | 2,868   |
| Acute coronary syndrome                      |                                   |                                    |                                    |                                   |                  |         |
| Ischemic stroke                              | 1 (1.2)                           | 0 (0.0)                            | 0 (0.0)                            | 21 (0.9)                          | 0.256            | 2,868   |
| Acute pulmonary embolism                     | 2 (2.4)                           | 10 (6.2)                           | 8 (3.0)                            | 86 (3.7)                          | 0.349            | 2,868   |
| Acute heart failure                          | 1 (1.2)                           | 2 (1.2)                            | 3 (1.1)                            | 180 (7.6)                         | <b>&lt;0.001</b> | 2,868   |
| Acute pericarditis                           | 1 (1.2)                           | 5 (3.1)                            | 2 (0.8)                            | 11 (0.5)                          | 0.006            | 2,868   |
| Acute myocarditis                            | 2 (2.4)                           | 6 (3.8)                            | 0 (0.0)                            | 14 (0.6)                          | <b>&lt;0.001</b> | 2,868   |

Otherwise specified, data are presented as mean ± SD. Percentages are based on patients for whom data were available.

\* CKD is defined as an eGFR  $\leq 60$  mL/min/1.73m<sup>2</sup>

*Abbreviations:* ACEi, angiotensin converting enzyme inhibitor; ARBs, angiotensin receptor blocker; BMI, body mass index; CAD, coronary artery disease; CKD, chronic kidney disease; COPD, chronic obstructive pulmonary disease; CVD, cardiovascular disease; eGFR, estimated glomerular filtration rate; ICU, intensive care unit; PAD, peripheral artery disease; VTE, venous thromboembolic; y/o, years old

**Supplementary Table S8. Univariate analysis for occurrence of primary outcome in young patients with COVID-19.**

| Variables                                     | Primary outcome  |                  | OR [CI 95%]       | p value          |
|-----------------------------------------------|------------------|------------------|-------------------|------------------|
|                                               | No (n=267)       | Yes (n=54)       |                   |                  |
| Demographic characteristics                   |                  |                  |                   |                  |
| Age (y/o) – median [IQR]                      | 36.2 [30.3;40.9] | 36.6 [33.3;40.6] | 1.02 [0.98-1.06]  | 0.400            |
| Male – n (%)                                  | 138 (51.7)       | 36 (66.7)        | 1.86 [1.01-3.51]  | <b>0.045</b>     |
| BMI – kg/m²                                   | 28.5 ± 6.2       | 30.5 ± 7.7       | 1.04 [1.00-1.09]  | 0.052            |
| Cardiovascular risk factors                   |                  |                  |                   |                  |
| Smoking – n (%)                               | 32 (12.4)        | 4 (7.4)          | 0.59 [0.16-1.57]  | 0.312            |
| Hypertension – n (%)                          | 19 (7.2)         | 10 (18.5)        | 2.92 [1.22-6.64]  | <b>0.017</b>     |
| Diabetes – n (%)                              | 15 (5.6)         | 5 (9.3)          | 1.74 [0.53-4.77]  | 0.334            |
| Dyslipidemia – n (%)                          | 11 (4.2)         | 4 (7.4)          | 1.89 [0.49-5.86]  | 0.327            |
| Medical history                               |                  |                  |                   |                  |
| Any – n (%)                                   | 97 (37.0)        | 37 (50.0)        | 1.70 [0.94-3.08]  | 0.081            |
| Stroke – n (%)                                | 2 (0.8)          | 1 (1.9)          | 2.62 [0.08-32.9]  | 0.505            |
| Atrial fibrillation – n (%)                   | 2 (0.8)          | 2 (3.7)          | 5.02 [0.51-49.1]  | 0.151            |
| Heart failure – n (%)                         | 5 (1.9)          | 3 (5.6)          | 3.10 [0.58-13.6]  | 0.168            |
| Malignancy – n (%)                            | 10 (3.8)         | 3 (5.6)          | 1.56 [0.32-5.42]  | 0.536            |
| VTE – n (%)                                   | 7 (2.6)          | 2 (3.7)          | 1.50 [0.20-6.62]  | 0.644            |
| Treatment before hospitalization              |                  |                  |                   |                  |
| None – n (%)                                  | 205 (76.8)       | 40 (74.1)        | 0.86 [0.45-1.74]  | 0.663            |
| Anticoagulation – n (%)                       | 8 (3.0)          | 1 (1.9)          | 0.69 [0.03-3.94]  | 0.722            |
| Beta-blockers – n (%)                         | 13 (4.9)         | 2 (3.7)          | 0.80 [0.11-3.05]  | 0.771            |
| ACEi – n (%)                                  | 7 (2.6)          | 1 (1.9)          | 0.78 [0.03-4.67]  | 0.824            |
| ARB – n (%)                                   | 6 (2.3)          | 2 (3.7)          | 1.75 [0.28-8.13]  | 0.536            |
| Diuretics – n (%)                             | 7 (2.6)          | 2 (3.7)          | 1.50 [0.20-6.62]  | 0.644            |
| Statins – n (%)                               | 4 (1.5)          | 3 (5.6)          | 3.89 [0.70-19.1]  | 0.113            |
| Immunosuppressor – n (%)                      | 17 (6.4)         | 4 (7.4)          | 1.12 [0.33-3.47]  | 0.751            |
| Clinical presentation                         |                  |                  |                   |                  |
| NYHA class III or IV – n (%)                  | 91 (38.9)        | 33 (75.0)        | 4.65 [2.29-10.10] | <b>&lt;0.001</b> |
| Heart rate – bpm                              | 91 ± 17          | 106 ± 17         | 1.05 [1.03-1.07]  | <b>&lt;0.001</b> |
| Systolic arterial pressure – mmHg             | 124 ± 18         | 128 ± 18         | 1.01 [1.00-1.03]  | 0.174            |
| Respiratory frequency – per min               | 23 ± 7           | 28 ± 8           | 1.09 [1.05-1.14]  | <b>&lt;0.001</b> |
| Temperature – °C                              | 37.6 ± 1.0       | 38.1 ± 1.1       | 1.74 [1.30-2.33]  | <b>&lt;0.001</b> |
| FiO₂ – %                                      | 25 ± 8           | 35 ± 15          | 1.09 [1.06-1.13]  | <b>&lt;0.001</b> |
| SIC score ≥4 – n (%)                          | 86 (55.8)        | 32 (88.9)        | 6.08 [2.26-21.70] | <b>&lt;0.001</b> |
| qSOFA ≥1 – n (%)                              | 100 (52.4)       | 38 (80.9)        | 3.78 [1.79-8.79]  | <b>&lt;0.001</b> |
| Abnormalities on chest CT                     |                  |                  |                   |                  |
| Severe parenchymal involvement (>50%) – n (%) | 18 (8.7)         | 18 (40.9)        | 7.13 [3.29-15.7]  | <b>&lt;0.001</b> |

Otherwise specified, data are presented as mean ± SD. Percentages are based on patients for whom data were available.

**Abbreviations:** ACEi, angiotensin converting enzyme inhibitor; ARB, angiotensin receptor blocker; BMI, body mass index; CT, computed tomography; FiO<sub>2</sub>, inspired oxygen fraction; NYHA, New-York Heart Association; OR, odds ratio; qSOFA, quick sequential organ failure assessment score; SIC, sepsis-induced coagulopathy score; VTE, venous thromboembolism; y/o, years old

**Supplementary Table S9. Subgroup analysis of the population without any comorbidities stratified by age.**

| Variables                                                 | Patients without any comorbidities |                        | p value | N value |
|-----------------------------------------------------------|------------------------------------|------------------------|---------|---------|
|                                                           | >45 y/o<br>(n = 473)               | 18-45 y/o<br>(n = 192) |         |         |
| Demographic characteristics                               |                                    |                        |         |         |
| Age – y/o                                                 | 61.5 ± 11.5                        | 34.8 ± 6.7             | <0.001  | 665     |
| Male – n (%)                                              | 279 (59.0)                         | 107 (55.7%)            | 0.494   | 665     |
| BMI – kg/m <sup>2</sup>                                   | 27.2 ± 5.3                         | 28.4 ± 6.5             | 0.037   | 563     |
| Clinical, biological and radiological data at admission   |                                    |                        |         |         |
| Time from illness onset to hospitalization – days         | 7.8 ± 4.4                          | 7.4 ± 4.2              | 0.314   | 650     |
| NYHA class III or IV – no (%)                             | 213 (51.6)                         | 69 (41.8)              | 0.043   | 578     |
| Respiratory frequency – per min                           | 24 ± 6                             | 24 ± 8                 | 0.793   | 492     |
| Temperature – °C                                          | 37.3 ± 1.0                         | 37.3 ± 1.0             | 0.812   | 658     |
| O <sub>2</sub> saturation – %                             | 95.1 ± 3.1                         | 96.0 ± 3.5             | 0.002   | 662     |
| HF signs – n (%)                                          | 9 (1.9)                            | 3 (1.6)                | 1.000   | 656     |
| SIC score ≥4 – n (%)                                      | 182 (66.2)                         | 72 (64.3)              | 0.812   | 387     |
| qSOFA ≥1 – n (%)                                          | 220 (63.4)                         | 84 (58.7)              | 0.388   | 490     |
| PaO <sub>2</sub> – mmHg                                   | 80 ± 22                            | 90 ± 43                | 0.009   | 476     |
| Lactate – mmol/L                                          | 1.2 ± 0.6                          | 1.2 ± 0.6              | 0.353   | 402     |
| Leukocytes – G/L                                          | 6.72 ± 2.90                        | 6.93 ± 3.23            | 0.451   | 643     |
| Lymphocytes – G/L                                         | 1.12 ± 0.89                        | 1.56 ± 1.87            | 0.003   | 638     |
| Haemoglobin – g/dL                                        | 13.6 ± 1.7                         | 13.8 ± 1.8             | 0.442   | 646     |
| Platelet – G/L                                            | 225 ± 97                           | 219 ± 80               | 0.395   | 640     |
| C-Reactive Protein – mg/L                                 | 95.2 ± 78.6                        | 69.9 ± 60.7            | <0.001  | 634     |
| Prothrombin rate – %                                      | 90 ± 11                            | 90 ± 12                | 0.637   | 519     |
| aPTT ratio – IU                                           | 1.1 ± 0.2                          | 1.1 ± 0.1              | 0.318   | 486     |
| eGFR – mL/min/1.73m <sup>2</sup>                          | 96 ± 20                            | 103 ± 18               | <0.001  | 649     |
| Aspartate aminotransferase –UI/L                          | 62 ± 87                            | 49 ± 40                | 0.012   | 595     |
| Alanine aminotransferase – UI/L                           | 52 ± 40                            | 69 ± 190               | 0.249   | 595     |
| Alkaline phosphatase – UI/L                               | 80 ± 73                            | 72 ± 43                | 0.092   | 527     |
| Gamma-glutamyl-transferase – UI/L                         | 88 ± 97                            | 78 ± 72                | 0.197   | 510     |
| Albumin – g/L                                             | 32.7 ± 6.1                         | 35.3 ± 6.5             | 0.001   | 352     |
| D-dimer – µg/L                                            | 1361 ± 2443                        | 1177 ± 2101            | 0.517   | 292     |
| Fibrinogen – g/L                                          | 6.2 ± 1.6                          | 5.4 ± 1.8              | <0.001  | 307     |
| Elevated BNP or NT-pro-BNP* – n (%)                       | 70 (28.1)                          | 4 (4.2)                | <0.001  | 344     |
| Troponin elevation <sup>†</sup> – no (%)                  | 63 (22.7)                          | 17 (15.5)              | 0.145   | 387     |
| Positive SARS-CoV-2 RT-PCR – n (%)                        | 432 (92.3)                         | 172 (90.1)             | 0.442   | 659     |
| Severe parenchymal involvement (>50%) on chest CT – n (%) | 84 (21.2)                          | 24 (15.8)              | 0.195   | 549     |
| Outcomes                                                  |                                    |                        |         |         |
| Transfer to ICU or in-hospital death – n. (%)             | 122 (25.8)                         | 27 (14.1)              | 0.001   | 665     |
| In-hospital death – n. (%)                                | 19 (4.0)                           | 1 (0.5)                | 0.032   | 665     |

|                                      |            |           |                  |     |
|--------------------------------------|------------|-----------|------------------|-----|
| Transfer to ICU – n. (%)             | 108 (22.8) | 27 (14.1) | <b>0.015</b>     | 665 |
| Length of stay – days                | 8.6 ± 6.0  | 6.3 ± 4.6 | <b>&lt;0.001</b> | 665 |
| Cardiovascular complication – n. (%) |            |           |                  |     |
| Acute coronary syndrome              | 3 (0.6)    | 0 (0.0)   | 0.561            | 665 |
| Ischemic stroke                      | 2 (0.4)    | 0 (0.0)   | 1.000            | 665 |
| Acute pulmonary embolism             | 25 (5.3)   | 9 (4.7)   | 0.902            | 665 |
| Acute heart failure                  | 7 (1.5)    | 1 (0.5)   | 0.449            | 665 |
| Acute pericarditis                   | 2 (0.4)    | 3 (1.6)   | 0.148            | 665 |
| Acute myocarditis                    | 1 (0.2)    | 5 (2.6)   | <b>0.009</b>     | 665 |

Otherwise specified, data are presented as mean ± SD.

*Abbreviations:* aPTT, activated partial thromboplastin time; BNP, brain natriuretic peptide; BMI, body mass index; CT, computed tomography; eGFR, estimated glomerular filtration rate; HF, heart failure; NT-pro-BNP, N-terminal pro-brain natriuretic peptide; NYHA, New-York Heart Association; PaO<sub>2</sub>, partial pressure of oxygen; qSOFA, quick sequential organ failure assessment score; RT-PCR, reverse-transcriptase polymerase chain reaction; SARS-CoV-2, severe acute respiratory syndrome coronavirus; SIC, sepsis-induced coagulopathy score; y/o, years old

**Supplementary Table S10. Outcomes in young patients according to troponin level.**

| Outcomes                                     | Patients 18-45 y/o with available troponin dosage (n = 185) |                            | p value      |
|----------------------------------------------|-------------------------------------------------------------|----------------------------|--------------|
|                                              | Troponin not elevated (n = 157)                             | Troponin elevated (n = 28) |              |
| Transfer to ICU or in-hospital death – n (%) | 27 (17.2)                                                   | 10 (35.7)                  | <b>0.045</b> |
| In-hospital death – n (%)                    | 1 (0.6)                                                     | 1 (3.6)                    | 0.280        |
| Transfer to ICU – n (%)                      | 26 (16.6)                                                   | 10 (35.7)                  | <b>0.036</b> |

*Abbreviations:* ICU, intensive care unit; y/o, years old

**Supplementary Table S11. Outcomes in young patients according to natriuretic peptides level.**

| Outcomes                                     | Patients 18-45 y/o with available BNP or NT-pro-BNP dosage (n = 159) |                                     | <i>p</i> value |
|----------------------------------------------|----------------------------------------------------------------------|-------------------------------------|----------------|
|                                              | BNP or NT-pro-BNP not elevated (n = 140)                             | BNP or NT-pro-BNP elevated (n = 19) |                |
| Transfer to ICU or in-hospital death – n (%) | 29 (20.7)                                                            | 3 (15.8)                            | 0.767          |
| In-hospital death – n (%)                    | 2 (1.4)                                                              | 1 (5.3)                             | 0.319          |
| Transfer to ICU – n (%)                      | 28 (20.0)                                                            | 3 (15.8)                            | 1.000          |

*Abbreviations:* BNP, brain natriuretic peptide; ICU, intensive care unit; NT-pro-BNP, N-terminal pro-brain natriuretic peptide; y/o, years old

**Supplementary Table S12. Characteristics and outcomes of the patients transferred to the intensive care unit stratified by transfer timing.**

| Variables                                  | Transfer to the ICU<br><24 hours<br>(n = 128) | Transfer to the ICU<br>>24 hours<br>(n = 421) | p value | N value |
|--------------------------------------------|-----------------------------------------------|-----------------------------------------------|---------|---------|
| <b>Demographic characteristics</b>         |                                               |                                               |         |         |
| Age (y/o)                                  | 60.8 ± 13.7                                   | 62.8 ± 12.6                                   | 0.146   | 549     |
| Male – n (%)                               | 98 (76.6)                                     | 290 (68.9)                                    | 0.119   | 549     |
| BMI – kg/m <sup>2</sup>                    | 29.3 ± 6.3                                    | 29.4 ± 6.1                                    | 0.871   | 510     |
| <b>Cardiovascular risk factors – n (%)</b> |                                               |                                               |         |         |
| Smoking                                    | 19 (15.2)                                     | 65 (15.9)                                     | 0.972   | 535     |
| Hypertension                               | 57 (45.2)                                     | 214 (51.2)                                    | 0.284   | 544     |
| Diabetes                                   | 31 (24.2)                                     | 124 (29.6)                                    | 0.285   | 547     |
| Dyslipidemia                               | 37 (28.9)                                     | 129 (30.8)                                    | 0.768   | 547     |
| Familial premature CVD                     | 1 (0.9)                                       | 9 (2.3)                                       | 0.470   | 502     |
| <b>Outcomes – n (%)</b>                    |                                               |                                               |         |         |
| In-hospital death                          | 19 (14.8)                                     | 55 (13.1)                                     | 0.712   | 549     |
| Acute coronary syndrome                    | 6 (1.4)                                       | 1 (0.8)                                       | 1.000   | 549     |
| Ischemic stroke                            | 8 (1.9)                                       | 1 (0.8)                                       | 0.692   | 549     |
| Acute pulmonary embolism                   | 34 (8.1)                                      | 8 (6.3)                                       | 0.624   | 549     |
| Acute heart failure                        | 36 (8.6)                                      | 7 (5.5)                                       | 0.343   | 549     |
| Acute pericarditis                         | 2 (0.5)                                       | 1 (0.8)                                       | 0.550   | 549     |
| Acute myocarditis                          | 6 (1.4)                                       | 1 (0.8)                                       | 1.000   | 549     |

Otherwise specified, data are presented as mean ± SD.

*Abbreviations:* BMI, body mass index; COVID-19, coronavirus disease 2019; CVD, cardiovascular disease; ICU, intensive care unit.

**Supplementary Figure S1. Troponin level according to the age of the patients (logarithmic transformation).**

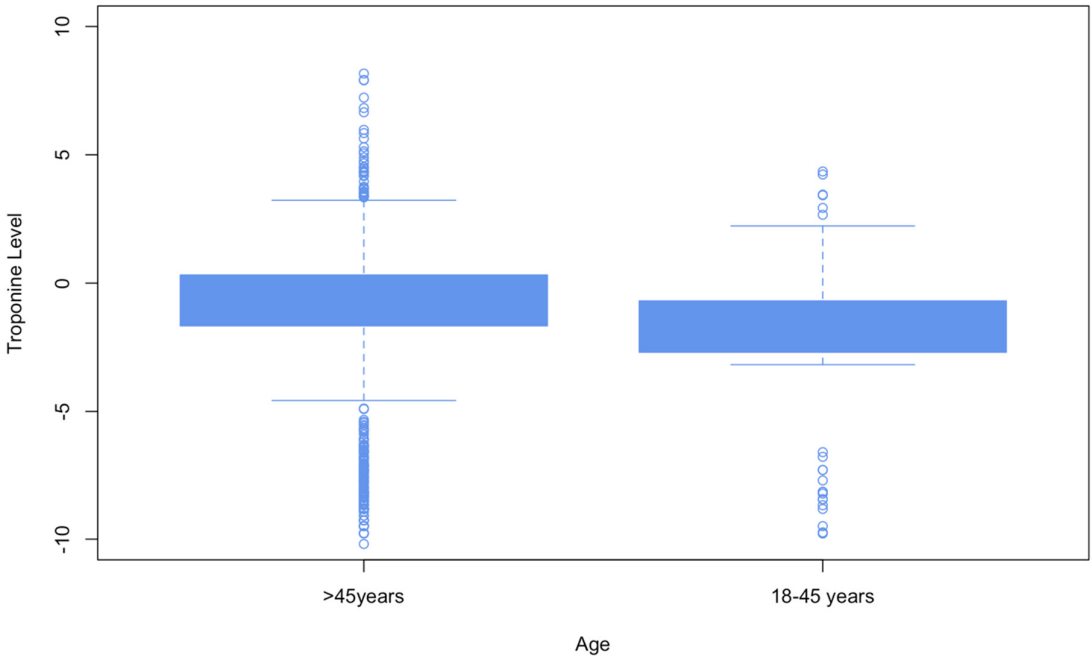

Supplementary Figure S2. Cardiovascular outcomes according to age.

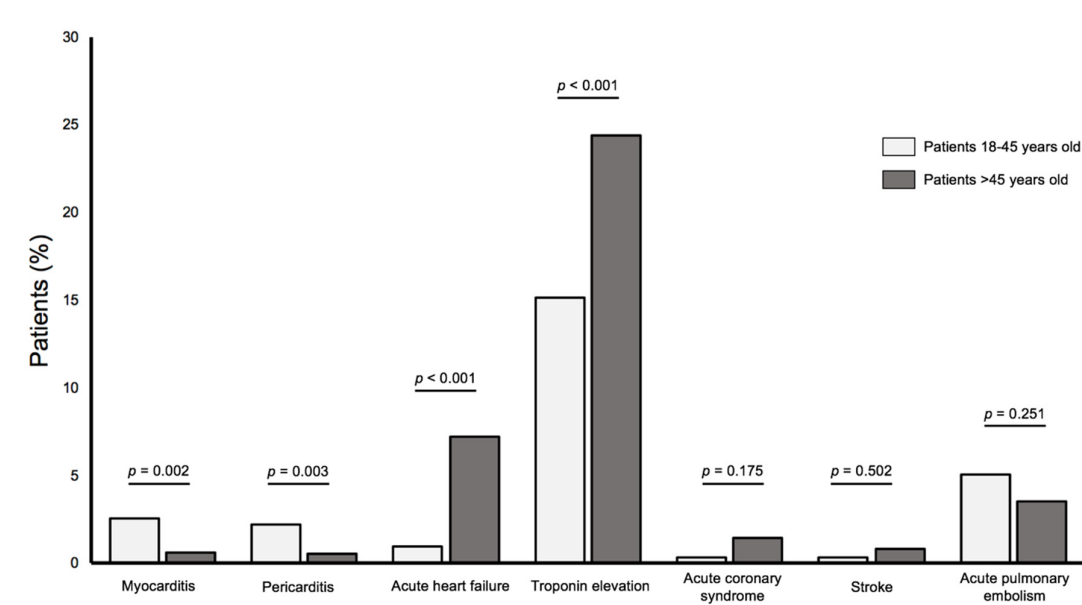

This figure shows the proportion of patients with each cardiovascular complication according to age (patients 18-45 years old and patients >45 years old). A  $p$  value is provided for each comparison.

**Supplementary Data 1. Critical COVID-19 France Investigators.**

ATTOU, Sabir, Centre Hospitalier Universitaire de Caen-Normandie, 14000 Caen, France

AUBRY, Matthieu, Hospices Civils de Lyon, Centre Hospitalier Universitaire, 69003 Lyon, France

BAGDADI, Imane, Institut Mutualiste Montsouris, 75014 Paris, France

BARBIN, Eva, Centre Hospitalier Régional de Orléans, 45100 Orléans, France

BARNAUD, Clément, Centre Hospitalier Régional de Orléans, 45100 Orléans, France

BENABOU, Léa, Centre Hospitalier Universitaire de Bordeaux, 33076 Bordeaux, France

BENMANSOUR, Othmane, Centre Hospitalier Régional de Orléans, 45100 Orléans, France

BONNET, Guillaume, Université de Paris, PARCC, INSERM, 75015 Paris, France

BOTHOREL, Léa, Centre Hospitalier Régional de Orléans, 45100 Orléans, France

BOUCHOT, Océane, Centre Hospitalier Annecy Genevois, 74370 Epagny Metz-Tessy, France

BOUFOULA, Ines, Centre Hospitalier Régional de Orléans, 45100 Orléans, France

CELLIER, Joffrey, Hôpital Européen Georges Pompidou, Université de Paris, 75015 Paris, France

CHABBI, Chaima, Centre Hospitalier Régional de Orléans, 45100 Orléans, France

CHAN, Camille, Centre Hospitalier Universitaire de Bordeaux, 33076 Bordeaux, France

CHAUMONT, Corentin, Hôpital Charles-Nicolle, Centre Hospitalier Universitaire de Rouen, 76000 Rouen, France

CHAVIGNIER, Diane, Centre Hospitalier Régional de Orléans, 45100 Orléans, France

CHEMALY, Pascale, Institut Cardiovasculaire Paris Sud, 91300 Massy, France

COHEN, Ariel, Saint Antoine Hospital, 75012 Paris, France

CUGNEY, Erwan, Centre Hospitalier Régional Universitaire de Nancy, 54511 Vandœuvre-Lès-Nancy, France

DARMON, Arthur, Hôpital Bichat-Claude-Bernard, APHP, Université de Paris, 75018 Paris, France

DELMOTTE, Thomas, Centre Hospitalier Universitaire de Reims, 51100 Reims, France

DELSARTE, Laura, Centre Hospitalier Régional Universitaire de Brest, 29200 Brest, France

DENEY, Antoine, Centre Hospitalier Universitaire de Toulouse, 31400 Toulouse, France

DOCQ, Clemence, Centre Hospitalier Universitaire de Lille, 59000 Lille, France

DOUAIR, Amine, Centre Hospitalier Annecy Genevois, 74370 Epagny Metz-Tessy, France

DUCEAU, Baptiste, Université de Paris, PARCC, INSERM, 75015 Paris, France

EZZOUHAIRI, Nacim, Centre Hospitalier Universitaire de Bordeaux, 33076 Bordeaux, France

FAUVEL, Charles, Centre Hospitalier Intercommunal Elbeuf, 76503 Saint-Aubin-lès-Elbeuf, France

FRAIX, Antoine, Centre Hospitalier Régional Universitaire de Nancy, 54511 Vandœuvre-Lès-Nancy, France

GAUTIER, Alexandre, Institut Cardiovasculaire Paris Sud, 91300 Massy, France

GENESTE, Laura, Centre Hospitalier Universitaire d'Amiens-Picardie, 80000 Amiens, France

GIORDANO, Gauthier, Centre Hospitalier Régional Universitaire de Nancy, 54511 Vandœuvre-Lès-Nancy, France

GODEAU, Guillaume, Institut Cardiovasculaire Paris Sud, 91300 Massy, France

GUILLEMINOT, Pierre, Centre Hospitalier Universitaire de Dijon, 21079 Dijon, France

KARSENTY, Clément, Centre Hospitalier Universitaire de Toulouse, 31400 Toulouse, France

LEBLON, Thiphaine, Centre Hospitalier Universitaire de Lille, Université Catholique de Lille, 59000 Lille, France

LEBOURDON, Romane, Centre Hospitalier Universitaire de Bordeaux, 33076 Bordeaux, France

LEVASSEUR, Thomas, Centre Hospitalier Intercommunal Fréjus-Saint-Raphaël, 83600 Fréjus, France

MA, Iris, Hôpital Européen Georges Pompidou, Université de Paris, 75015 Paris, France

MARSOU, Wassima, Centre Hospitalier Universitaire de Lille, Université Catholique de Lille, 59000 Lille, France

MASSIN, Michael, Centre Hospitalier Régional Universitaire de Nancy, 54511 Vandœuvre-Lès-Nancy, France

MECHERI, Yasmine, Centre Hospitalier Régional de Orléans, 45100 Orléans, France

MEVELEC, Marine, Centre Hospitalier Régional de Orléans, 45101 Orléans, France

MIKA, Delphine, Université Paris-Saclay, Inserm, UMR-S 1180, 92296 Chatenay-Malabry, France

NOIRCLERC, Nathalie, Centre Hospitalier Annecy Genevois, 74370 Epagny Petz-Tessy, France

PACE, Nathalie, Centre Hospitalier Régional Universitaire de Nancy, 54511 Vandœuvre-Lès-Nancy, France

PANAGIDES, Vassili, Centre Hospitalier Universitaire de Marseille, 13005 Marseille, France

PASTIER, Julie, Centre Hospitalier Universitaire de Dijon, 21079 Dijon, France

PERIN, Benjamin, Centre Hospitalier Régional Universitaire de Nancy, 54511 Vandœuvre-Lès-Nancy, France

PEZEL, Théo, Cardiology, Lariboisière hospital, APHP, University of Paris, 75010 Paris, France

POMMIER, Thibaut, Centre Hospitalier Universitaire de Dijon, 21079 Dijon, France

RIBEYROLLES, Sophie, Institut Mutualiste Montsouris, 75014 Paris, France

SAGNARD, Audrey, Centre Hospitalier Universitaire de Dijon, 21079 Dijon, France

SUTTER, Willy, Université de Paris, PARCC, INSERM, 75015 Paris, France

TRIMAILLE, Antonin, Nouvel Hôpital Civil, Centre Hospitalier Régional Universitaire de Strasbourg,  
67000 Strasbourg, France

WALDMANN, Victor, Université de Paris, PARCC, INSERM, 75015 Paris, France

WEIZMAN, Orianne, Centre Hospitalier Régional Universitaire de Nancy, 54511 Vandœuvre-Lès-  
Nancy, France

YVOREL, Cédric, Centre Hospitalier Universitaire de Saint-Etienne, 42270 Saint-Priest-en-Jarez

ZAKINE, Cyril, Clinique Saint-Gatien, 37540 Saint-Cyr-sur-Loire, France

## Supplementary Data 2. STROBE Statement.

|                              | Item | Recommendation                                                                                                                                                                                      | Page           |
|------------------------------|------|-----------------------------------------------------------------------------------------------------------------------------------------------------------------------------------------------------|----------------|
| Title and abstract           | 1    | (a) Indicate the study's design with a commonly used term in the title or the abstract                                                                                                              | 1              |
|                              |      | (b) Provide in the abstract an informative and balanced summary of what was done and what was found                                                                                                 | 1              |
| Introduction                 |      |                                                                                                                                                                                                     |                |
| Background/rationale         | 2    | Explain the scientific background and rationale for the investigation being reported                                                                                                                | 2              |
| Objectives                   | 3    | State specific objectives, including any prespecified hypotheses                                                                                                                                    | 2              |
| Methods                      |      |                                                                                                                                                                                                     |                |
| Study design                 | 4    | Present key elements of study design early in the paper                                                                                                                                             | 2-3            |
| Setting                      | 5    | Describe the setting, locations, and relevant dates, including periods of recruitment, exposure, follow-up, and data collection                                                                     | 2-3            |
| Participants                 | 6    | (a) Give the eligibility criteria, and the sources and methods of selection of participants. Describe methods of follow-up                                                                          | 2              |
|                              |      | (b) For matched studies, give matching criteria and number of exposed and unexposed                                                                                                                 | NA             |
| Variables                    | 7    | Clearly define all outcomes, exposures, predictors, potential confounders, and effect modifiers. Give diagnostic criteria, if applicable                                                            | 3              |
| Data sources/<br>measurement | 8*   | For each variable of interest, give sources of data and details of methods of assessment (measurement). Describe comparability of assessment methods if there is more than one group                | 3              |
| Bias                         | 9    | Describe any efforts to address potential sources of bias                                                                                                                                           | 3              |
| Study size                   | 10   | Explain how the study size was arrived at                                                                                                                                                           | 3              |
| Quantitative<br>variables    | 11   | Explain how quantitative variables were handled in the analyses. If applicable, describe which groupings were chosen and why                                                                        | 3              |
|                              |      | (a) Describe all statistical methods, including those used to control for confounding                                                                                                               | 3              |
| Statistical methods          | 12   | (b) Describe any methods used to examine subgroups and interactions                                                                                                                                 | 3              |
|                              |      | (c) Explain how missing data were addressed                                                                                                                                                         | NA             |
|                              |      | (d) If applicable, explain how loss to follow-up was addressed                                                                                                                                      | NA             |
|                              |      | (e) Describe any sensitivity analyses                                                                                                                                                               | NA             |
| Results                      |      |                                                                                                                                                                                                     |                |
| Participants                 | 13*  | (a) Report numbers of individuals at each stage of study—e.g. numbers potentially eligible, examined for eligibility, confirmed eligible, included in the study, completing follow-up, and analysed | 3-4            |
|                              |      | (b) Give reasons for non-participation at each stage                                                                                                                                                | 3-4            |
|                              |      | (c) Consider use of a flow diagram                                                                                                                                                                  | Figure 1       |
| Descriptive data             | 14*  | (a) Give characteristics of study participants (eg demographic, clinical, social) and information on exposures and potential confounders                                                            | 4              |
|                              |      | (b) Indicate number of participants with missing data for each variable of interest                                                                                                                 | Table 1        |
| Outcome data                 | 15*  | Report numbers of outcome events or summary measures over time                                                                                                                                      | 4-5<br>Table 3 |

|                          |    |                                                                                                                                                                                                                                                                                                                                                                                                               |                  |
|--------------------------|----|---------------------------------------------------------------------------------------------------------------------------------------------------------------------------------------------------------------------------------------------------------------------------------------------------------------------------------------------------------------------------------------------------------------|------------------|
| Main results             | 16 | (a) Give unadjusted estimates and, if applicable, confounder-adjusted estimates and their precision (eg, 95% confidence interval). Make clear which confounders were adjusted for and why they were included<br>(b) Report category boundaries when continuous variables were categorized<br>(c) If relevant, consider translating estimates of relative risk into absolute risk for a meaningful time period | 4-5<br>4-5<br>NA |
| Other analyses           | 17 | Report other analyses done—eg analyses of subgroups and interactions, and sensitivity analyses                                                                                                                                                                                                                                                                                                                | 94-5             |
| <b>Discussion</b>        |    |                                                                                                                                                                                                                                                                                                                                                                                                               |                  |
| Key results              | 18 | Summarise key results with reference to study objectives                                                                                                                                                                                                                                                                                                                                                      | 6                |
| Limitations              | 19 | Discuss limitations of the study, taking into account sources of potential bias or imprecision. Discuss both direction and magnitude of any potential bias                                                                                                                                                                                                                                                    | 8                |
| Interpretation           | 20 | Give a cautious overall interpretation of results considering objectives, limitations, multiplicity of analyses, results from similar studies, and other relevant evidence                                                                                                                                                                                                                                    | 6-8              |
| Generalisability         | 21 | Discuss the generalisability (external validity) of the study results                                                                                                                                                                                                                                                                                                                                         | 6-8              |
| <b>Other information</b> |    |                                                                                                                                                                                                                                                                                                                                                                                                               |                  |
| Funding                  | 22 | Give the source of funding and the role of the funders for the present study and, if applicable, for the original study on which the present article is based                                                                                                                                                                                                                                                 | 9                |
